# Supplementary material for: Bi0.5Sb1.5Te3-based films for flexible thermoelectric devices
Source: Royal Society of Chemistry journal article supplement (doi:10.1039/c9ta13152c), 2020-01-01
Supplement: c9ta13152c1.pdf [file c9ta13152c1.pdf]

*Supplementary information*

## **Bi<sub>0.5</sub>Sb<sub>1.5</sub>Te<sub>3</sub>-based Films for Flexible Thermoelectric Devices**

Hongjing Shang<sup>a,b,c,#</sup>, Chaochao Dun<sup>d,#</sup>, Yuan Deng<sup>e</sup>, Taiguang Li<sup>a,b,c</sup>, Zhaoshun Gao<sup>a,b,c</sup>, Liye Xiao<sup>a,b,c</sup>, Hongwei Gu<sup>a,b,c,\*</sup>, David J. Singh<sup>f,g</sup>, Zhifeng Ren<sup>h\*</sup> and Fazhu Ding<sup>a,b,c,\*</sup>

<sup>a</sup> Key Laboratory of Applied Superconductivity, Chinese Academy of Sciences, Beijing 100190, China

<sup>b</sup> Institute of Electrical Engineering, Chinese Academy of Sciences, Beijing 100190, China

<sup>c</sup> University of Chinese Academy of Sciences, Beijing 100049, China

<sup>d</sup> Aerospace and Mechanical Engineering, University of Notre Dame, Indiana 46556, USA

<sup>e</sup> School of Materials Science & Engineering, Beihang University, Beijing, 100191, China

<sup>f</sup> Department of Physics and Astronomy, University of Missouri, Columbia, MO 65211, USA

<sup>g</sup> Department of Chemistry, University of Missouri, Columbia, MO 65211, USA

<sup>h</sup> Department of Physics and TeSUH, University of Houston, Houston, TX 77204, USA

### **Corresponding authors:**

Hongwei Gu: [guh@mail.iee.ac.cn](mailto:guh@mail.iee.ac.cn);

Zhifeng Ren: [zren@uh.edu](mailto:zren@uh.edu);

Fazhu Ding: [dingfazhu@mail.iee.ac.cn](mailto:dingfazhu@mail.iee.ac.cn)

<sup>#</sup>These authors contributed equally: Hongjing Shang, Chaochao Dun

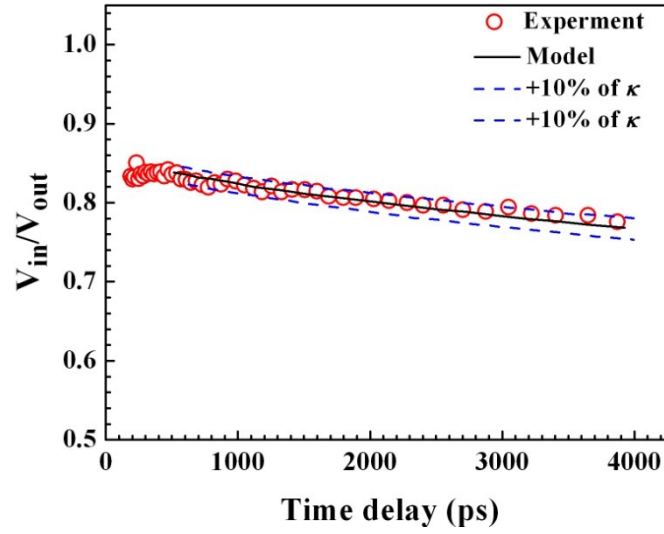

**Fig. S1.** Measurement of  $\kappa$  based on the TDTR method.

**Table S1.** Measurement results of  $\kappa$ .

| Sample | $\kappa$ (W m <sup>-1</sup> K <sup>-1</sup> ) |         |        |
|--------|-----------------------------------------------|---------|--------|
|        | Measured value                                | Average | Error  |
| 1      | 0.7217                                        | 0.7835  | 0.0874 |
| 2      | 0.8453                                        |         |        |

The thermal conductivity ( $\kappa$ ) was measured by the time-domain thermoreflectance (TDTR) method. The heat capacity ( $c$ ) of Bi<sub>0.5</sub>Sb<sub>1.5</sub>Te<sub>3</sub> was calculated based on that of Bi<sub>2</sub>Te<sub>3</sub> and Sb<sub>2</sub>Te<sub>3</sub>. Provided by DuPont,  $\kappa$  and  $c$  of PI are 0.12 W m<sup>-1</sup> K<sup>-1</sup> and 1.5478 MJ m<sup>-3</sup> K<sup>-1</sup>, respectively.

The ratio ( $V_{in}/V_{out}$ ) of the in-phase  $V_{in}$  and out-of-phase  $V_{out}$  signals was fitted as a function of time delay by a diffusive thermal model to extract the thermal properties, as shown in Fig. S1. Measurements were performed more than twice to confirm the reliability of the TDTR method, with the average value determined to be the final  $\kappa$  of

the samples, as shown in Table S1.

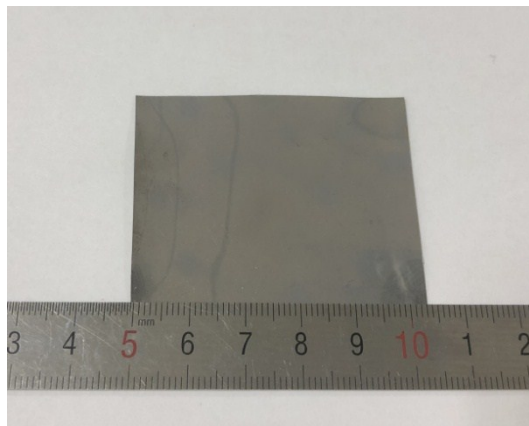

**Fig. S2.** Photograph of the fabricated flexible  $\text{Bi}_{0.5}\text{Sb}_{1.5}\text{Te}_3$ -based film.

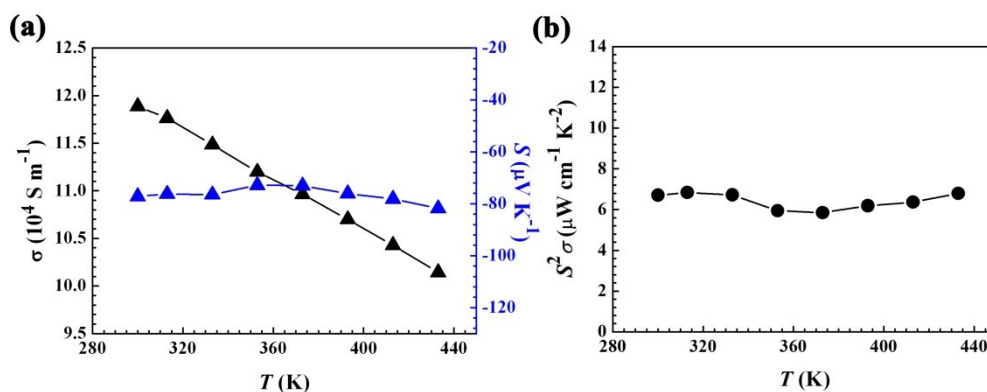

**Fig. S3.** Temperature-dependent TE properties of  $\text{Bi}_2\text{Te}_3$  films: (a)  $\sigma$  and  $S$ , and (b)

$$S^2\sigma.$$

$\text{Bi}_2\text{Te}_3$  thin films were prepared on PI substrates under Ar atmosphere at 653 K using the magnetron sputtering method. The hot-pressed  $\text{Bi}_2\text{Te}_3$  (99.999 at.%) target was used as the source material and connected to a direct power supplier with sputtering power of 20 W. The pressure of the deposition chamber was below  $7.5 \times 10^{-4}$  Pa. During the deposition process, the distance between the substrate and the targets was fixed at 140 mm. The working pressure was about 3.0 Pa, with the substrate holder rotating at around 30 rpm. The thickness of the thin films is about 420 nm.

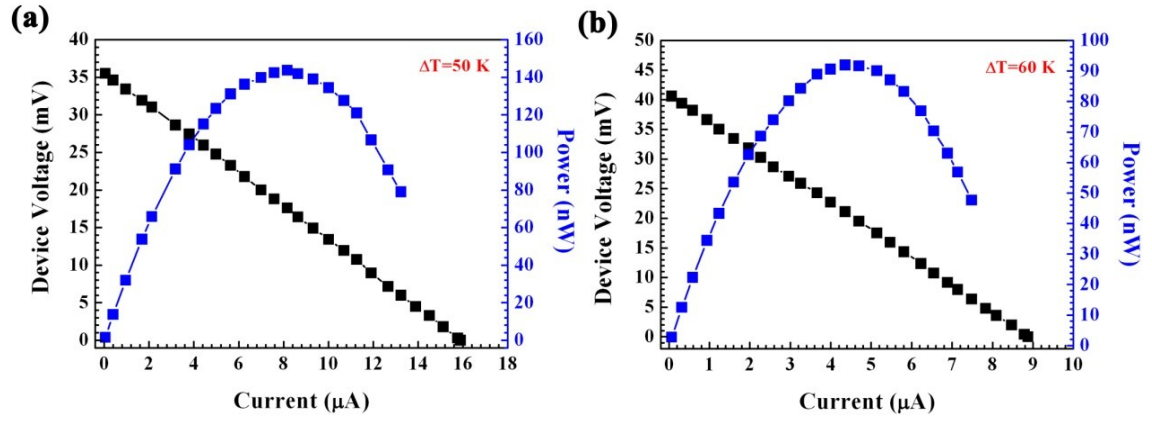

**Fig. S4.** Current-dependent device-operating voltage and power output tested at different  $\Delta T$ : (a) 50 K and (b) 60 K.
